# Supplementary material
Source: publisher site journal article supplement (https://www.dovepress.com/article/325220)
Supplement: Supplementary file 1 [file get_supplementary_file.php]

**Supplement Figure 1 A**. Wright map: Person-item distribution for individual items of the AIS: Factor-1 (Sleep characteristics)


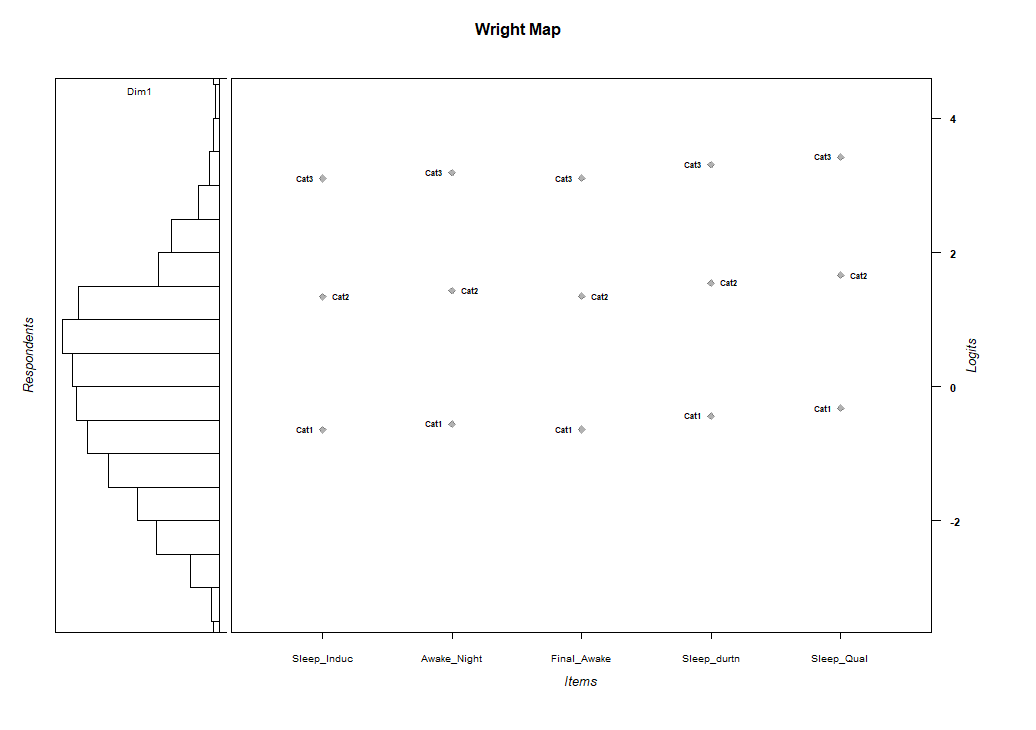


**Supplement Figure 1 B**. Wright map: Person-item distribution for individual items of the AIS: Factor-2 (Daytime symptoms)


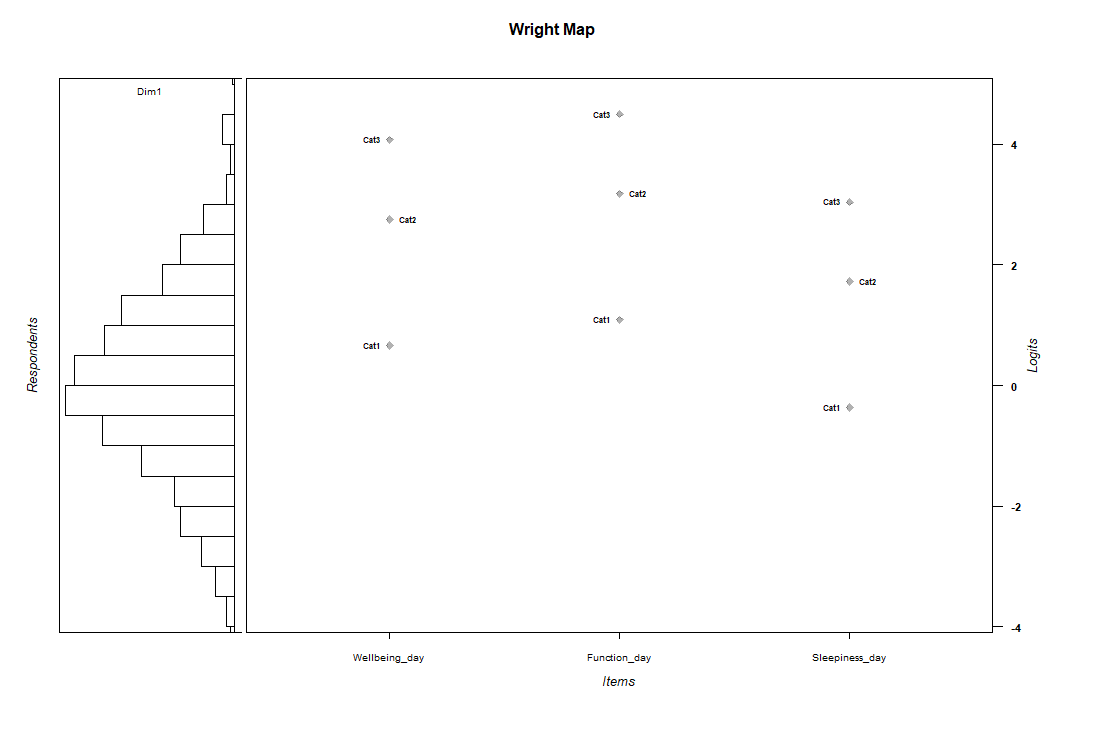


Athens Insomnia Scale (AIS) items; **Sleep_Induc**: Sleep induction, **Awake_Night**: Awakenings during the night, **Final_Awake**: Final awakening earlier than desired, **Sleep_durtn**: Total sleep duration, **Sleep_Qual**: Overall quality of sleep, **Wellbeing_day**: Sense of wellbeing during the day, **Function_day**: Functioning (physical and mental) during the day, and **Sleepiness_day**: Sleepiness during the day.

Cat1 to Cat3: Level of scoring for each items; Cat0 is not shown as it is the reference level. Dim1: dimension-1.

**Supplement Table 1** Sample size adequacy measures of the Athens Insomnia Scale (AIS) scores in nurses

| Measures | Values | | |
| --- | --- | --- | --- |
| Total sample | CFA sub-sample | EFA sub-sample |
| Anti-image matrix | 0.84-0.93 | 0.82-0.91 | 0.84-0.91 |
| Bartlett’s test of Sphericity | *Χ*2 (28) = 1759.4, *p*<0.001 | *Χ*2 (28) = 948.0, *p*<0.001 | *Χ*2 (28) = 852.9, *p*<0.001 |
| Determinant | .043 | 0.032 | 0.046 |
| Kaiser-Meyer-Olkin Test of Sampling Adequacy (KMO) | 0.88 | 0.86 | 0.87 |
| Communality | 0.32-0.69 | 0.28-0.73 | 0.35-0.66 |

CFA: Confirmatory factor analysis, EFA: Exploratory factor analysis

**Supplement Table 2** Inter-item Correlation matrix of the Athens Insomnia Scale (AIS) scores in nurses

| Items of  the AIS | AIS-1 | AIS-2 | AIS-3 | AIS-4 | AIS-5 | AIS-6 | AIS-7 | AIS-8 | CFA sub-sample |
| --- | --- | --- | --- | --- | --- | --- | --- | --- | --- |
| AIS-1 |  | .51** | .25** | .50** | .52** | .34** | .36** | .36** |
| AIS-2 |  |  | .37** | .48** | .52** | .45** | .37** | .30** |
| AIS-3 |  |  |  | .44** | .41** | .29** | .27** | .21** |
| AIS-4 |  |  |  |  | .76** | .55** | .50** | .31** |
| AIS-5 |  |  |  |  |  | .54** | .54** | .32** |
| AIS-6 |  |  |  |  |  |  | .63** | .27** |
| AIS-7 |  |  |  |  |  |  |  | .35** |
| AIS-8 |  |  |  |  |  |  |  |  |
|  | | | | | | | | | |
| AIS-1 |  | .37** | .37** | .30** | .35** | .42** | .32** | .17** | EFA sub-sample |
| AIS-2 |  |  | .53** | .45** | .44** | .38** | .38** | .36** |
| AIS-3 |  |  |  | .45** | .39** | .35** | .29** | .33** |
| AIS-4 |  |  |  |  | .71** | .50** | .45** | .41** |
| AIS-5 |  |  |  |  |  | .56** | .51** | .38** |
| AIS-6 |  |  |  |  |  |  | .62** | .37** |
| AIS-7 |  |  |  |  |  |  |  | .37** |
| AIS-8 |  |  |  |  |  |  |  |  |

* *p* < 0.05; ***p* < 0.01; EFA: exploratory factor analysis; CFA: confirmatory factor analysis

**Supplement Table 3** Summary of the factor extraction measures used in principal component analysis of the Athens Insomnia Scale (AIS) scores in nurses

| Number of Factors | Eigenvalue | Cumulative Variance Explained (%) | Above point of inflection on Scree plot | Decision to extract | | |
| --- | --- | --- | --- | --- | --- | --- |
| Kaiser’s criteria (Eigenvalue≥1) | Cumulative variance rule (>40%) | Scree test |
| 1 | 4.04 | 50.44 | Yes | √ | √ | √ |
| 2 | 0.88 | 61.43 | No | Χ | Χ | Χ |
| 3 | 0.80 | 71.41 | No | Χ | Χ | Χ |
| 4 | 0.67 | 79.73 | No | Χ | Χ | Χ |

√ indicates extraction criteria fulfilled, Χ indicates otherwise
